# Supplementary material
Source: bioRxiv or medRxiv preprint supplement (https://www.biorxiv.org/highwire/filestream/1573/field_highwire_adjunct_files/4/000992-5.pdf)
Supplement: Supplementary file [file 000992-5.pdf]

# Supporting File 1: Mutated SF3B1 is associated with transcript isoform changes of the genes UQCC and RPL31 both in CLLs and uveal melanomas

Alejandro Reyes, Carolin Blume, Vicent Pelechano, Petra Jakob,  
Lars M Steinmetz, Thorsten Zenz, Wolfgang Huber

2013

## Contents

|          |                                             |           |
|----------|---------------------------------------------|-----------|
| <b>1</b> | <b>Preparation</b>                          | <b>2</b>  |
| <b>2</b> | <b>Testing for differential exon usage</b>  | <b>2</b>  |
| <b>3</b> | <b>Reactome pathway enrichment analysis</b> | <b>3</b>  |
| <b>4</b> | <b>Differential expression</b>              | <b>7</b>  |
| <b>5</b> | <b>Figures</b>                              | <b>11</b> |
| 5.1      | Figure 1 . . . . .                          | 12        |
| 5.2      | Figure 2: RPL31 . . . . .                   | 17        |
| 5.3      | Figure 3: UQCC . . . . .                    | 20        |
| <b>6</b> | <b>Session information</b>                  | <b>27</b> |

This document contains a documented R session with all the code used to analyse the RNA-seq data. It also describes the code used to generate the figure templates from the manuscript. Readers are welcome to reproduce the code.

## 1 Preparation

In order to reproduce the code from this document, the Bioconductor data package `CLL.SF3B1` should be installed. This package contains input files that resulted from a first round of data preprocessing that are needed to reproduce the results. Therefore, we first load the package and the data:

```
suppressMessages( library("CLL.SF3B1") )
data("ecsSF3B1")
```

If you don't have the package installed, you can install it by typing in your R session

```
biocLite("CLL.SF3B1")
```

Also, modify the variable "cores" specifying the number of CPUs available in your machine. This will allow to distribute the computationally expensive jobs into many cores.

```
cores <- 15
```

## 2 Testing for differential exon usage

```
ecsSF3B1 <- estimateSizeFactors( ecsSF3B1 )
formulaDispersion <- ~ sample + ( phenotype + sf3b1 ) * exon
ecsSF3B1 <- estimateDispersions( ecsSF3B1, formula=formulaDispersion, nCores=cores )
ecsSF3B1 <- fitDispersionFunction( ecsSF3B1 )
formula0 = ~sample + sf3b1 + exon
formula1 = ~sample + sf3b1 * exon
ecsSF3B1 <- testForDEU( ecsSF3B1, formula0=formula0, formula1=formula1, nCores=cores )
```

We found 50 exons to be differentially used between the mutated samples and the normal samples

```
table( fData(ecsSF3B1)$padjust < 0.1 )
```

```
FALSE TRUE
253106 50
```

These were distributed along 41 genes

```
genes <- unique( geneIDs(ecsSF3B1)[which( fData(ecsSF3B1)$padjust < 0.1 )] )
length(genes)

[1] 41
```

### 3 Reactome pathway enrichment analysis

Then, we download the file from the database reactome that maps uniprot gene identifiers to annotated pathways and read it as a data frame. After download, we reformat the data frame to make it easier to access.

```
reactome <- read.delim(
  url(
    "http://www.reactome.org/download/current/uniprot_2_pathways.txt"
  ),
  header=FALSE)

rownames(reactome) <- as.character( reactome$V1 )

processes <- gsub(
  "^\\[\\d+\\sprocesses\\]: ",
  "",
  as.character( reactome$V3 ),
  perl=TRUE)

processes <- strsplit( processes, "; ")

names( processes ) <- rownames( reactome )
processesDF <- lapply(
  seq_along( processes ),
  function(x){
    data.frame(
```

```

        uniprot=names(processes)[x],
        process=processes[[x]]
    )
})
processesDF <- do.call( rbind, processesDF )
head( processesDF )

```

```

    uniprot                                process
1  E9Q414 Binding and Uptake of Ligands by Scavenger Receptors
2  E9Q414                                Scavenging by Class A Receptors
3  E9Q414                                Scavenging by Class B Receptors
4  G5EF96                                Axon guidance
5  G5EF96                                DCC mediated attractive signaling
6  G5EF96                                Developmental Biology

```

The pathways in reactome are based on uniprot IDs, therefore we use biomaRt to map our ensembl gene identifiers with uniprot identifiers. We do the same to translate ensembl gene IDs to gene names.

```

library(biomaRt)
mart <- useMart("ensembl", dataset="hsapiens_gene_ensembl")
bm <- getBM(
  attributes=
    c("ensembl_gene_id", "uniprot_swissprot_accession"),
  filter="ensembl_gene_id",
  values=
    as.character(unique(geneIDs(ecsSF3B1))),
  mart=mart )
uniprots <- bm$'uniprot_swissprot_accession'
names( uniprots ) <- bm$'ensembl_gene_id'
uniprots <- uniprots[uniprots != ""]

bm <- getBM(
  c("ensembl_gene_id", "external_gene_id"),
  "ensembl_gene_id",
  values=as.character(unique(geneIDs(ecsSF3B1))),
  mart=mart)

geneName <- bm$'external_gene_id'
names(geneName) <- bm$'ensembl_gene_id'

```

Now we can test for over-representation of the genes with isoform regulation associated to the mutation in SF3B1 compared to all the genes that contain at least 600 counts across all the samples. We do this in order to avoid biases associated to expression strength.

```
library(DESeq2)

foreground <- uniprots[names(uniprots) %in% genes]
toTest <- unique(
  processesDF[processesDF[, "uniprot"]
    %in% foreground, "process" ] )

expressed <- rownames(counts(dseSF3B1))[rowSums( counts(dseSF3B1) ) > 600]
background <- uniprots[names(uniprots) %in% expressed]

testForReactome <- function( toTest, foreground, background ){
  pvals <- mclapply( toTest, function(x){
    df2 <- processesDF[processesDF[, "process"] %in% x,]
    a <- sum( df2[, "uniprot"] %in% foreground )
    b <- sum( df2[, "uniprot"] %in% background )
    c <- df2[, "uniprot"] %in% foreground
    c <- unique( df2[, "uniprot"][which(c)] )
    c <- paste(c, collapse=",")
    c(a, length(foreground) - a)
    mat <- t( data.frame(
      fore=c(a, length(foreground)-a),
      back=c(b, length( background)-b ) )
    )
    colnames(mat) <- c("in", "out")
    ft <- fisher.test( mat , alternative="greater" )
    ft$estimate
    list( genes=c,
      numbers=c( foreground=mat[1,],
        background=mat[2,],
        ft$estimate,
        pval=ft$p.value ))
  }, mc.cores=cores)
names(pvals) <- toTest
againstMM <- pvals
```

```

for(i in seq_along( againstMM )){
  sepGenes <- unlist( strsplit( againstMM[[i]]$genes, "," ) )
  againstMM[[i]]$geneNames <- paste(
    unique( geneName[names( uniprots[uniprots %in% sepGenes] )] ),
    collapse="," )
}

table <- t( sapply( againstMM, "[", "numbers" ) )
table <- as.data.frame( table )
table$genes <- sapply( againstMM, "[", "geneNames" )
table$padj <- p.adjust( table$pval, method="BH" )
table
}

allGenes <- testForReactome(toTest, uniprots[names(uniprots) %in% genes], background )
enriched <- allGenes[allGenes$padj < 0.1,c("foreground.in", "pval", "genes")]
rownames(enriched)

```

Antigen Presentation: Folding, assembly and peptide loading of class I MHC  
 Antigen processing-Cross presentation  
 Cytokine Signaling in Immune system  
 Endosomal/Vacuolar pathway  
 Immunoregulatory interactions between a Lymphoid and a non-Lymphoid cell  
 Interferon Signaling  
 Interferon gamma signaling  
 Processing of Capped Intron-Containing Pre-mRNA  
 mRNA Splicing  
 mRNA Splicing - Major Pathway  
 Acyl chain remodelling of PG  
 Acyl chain remodelling of PI  
 Acyl chain remodelling of PS  
 Cap-dependent Translation Initiation  
 Eukaryotic Translation Initiation  
 GTP hydrolysis and joining of the 60S ribosomal subunit  
 Translation  
 3' -UTR-mediated translational regulation  
 L13a-mediated translational silencing of Ceruloplasmin expression

## 4 Differential expression

We tested for differential expression between the samples with mutated SF3B1 and the samples with wt SF3B1.

```
data("dseSF3B1")
dseSF3B1 <- DESeq(dseSF3B1)
res <- results(dseSF3B1)
upregulated <-
  rownames(res)[
    which( res$padj < 0.1 & res$log2FoldChange > 0 )]
downregulated <-
  rownames(res)[
    which( res$padj < 0.1 & res$log2FoldChange < 0 )]

table( res$padj < 0.1 )

  estimating size factors
  estimating dispersions
  gene-wise dispersion estimates
  mean-dispersion relationship
  final dispersion estimates
  fitting model and testing

FALSE TRUE
14315  228

plotMA(dseSF3B1, ylim=c(-3, 3))
```

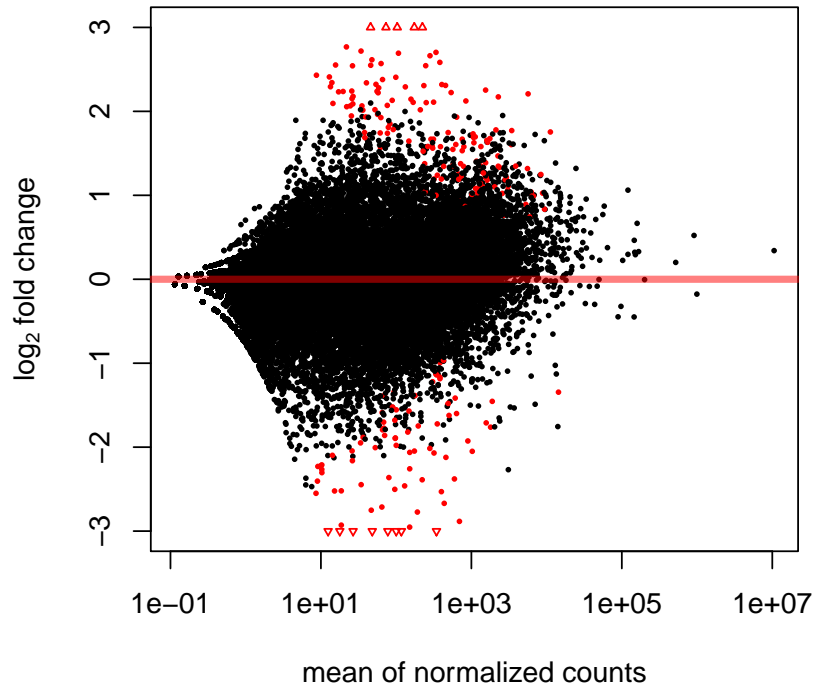

Set of upregulated genes on SF3B1 mutated genes

```
geneName[names(geneName) %in% downregulated]
```

```

ENSG00000168675 ENSG00000156755 ENSG00000199691 ENSG00000202058 ENSG00000077782
      "LDLRAD4"      "IGKV10R-2"      "RN7SKP173"      "RN7SKP80"      "FGFR1"
ENSG00000111331 ENSG00000241666 ENSG00000224295 ENSG00000202077 ENSG00000252481
      "OAS3"      "RP3-455J7.4"      "AC087380.14"      "RNU1-60P"      "SCARNA13"
ENSG00000104938 ENSG00000199879 ENSG00000203799 ENSG00000112242 ENSG00000261040
      "CLEC4M"      "RNU1-120P"      "CCDC162P"      "E2F3"      "CTD-2319I12.1"
ENSG00000148926 ENSG00000161513 ENSG00000252010 ENSG00000251495 ENSG00000175893
      "ADM"      "FDXR"      "SCARNA5"      "PPIAP11"      "ZDHHC21"
ENSG00000166510 ENSG00000137628 ENSG00000188886 ENSG00000158050 ENSG00000159256
      "CCDC68"      "DDX60"      "ASTL"      "DUSP2"      "MORC3"
ENSG00000123739 ENSG00000244405 ENSG00000198642 ENSG00000170734 ENSG00000117862

```



|                 |                 |                 |                 |                 |
|-----------------|-----------------|-----------------|-----------------|-----------------|
| "PLA2G12A"      | "ETV5"          | "KLHL9"         | "POLH"          | "TXNDC12"       |
| ENSG00000100596 | ENSG00000133103 | ENSG00000145864 | ENSG00000198440 | ENSG00000257151 |
| "SPTLC2"        | "COG6"          | "GABRB2"        | "ZNF583"        | "PWAR6"         |
| ENSG00000207133 | ENSG00000160551 | ENSG00000149485 | ENSG00000149054 | ENSG00000128482 |
| "SNORD116-7"    | "TAOK1"         | "FADS1"         | "ZNF215"        | "RNF112"        |
| ENSG00000133835 | ENSG00000101577 | ENSG00000139116 | ENSG00000166710 | ENSG00000248302 |
| "HSD17B4"       | "LPIN2"         | "KIF21A"        | "B2M"           | "Z95704.4"      |
| ENSG00000211553 | ENSG00000006831 | ENSG00000069329 | ENSG00000152767 | ENSG00000171208 |
| "AC118278.1"    | "ADIPOR2"       | "VPS35"         | "FARP1"         | "NETO2"         |
| ENSG00000102349 | ENSG00000121101 | ENSG00000164296 | ENSG00000111266 | ENSG00000102053 |
| "KLF8"          | "TEX14"         | "TIGD6"         | "DUSP16"        | "ZC3H12B"       |
| ENSG00000122877 | ENSG00000203668 | ENSG00000135698 | ENSG00000089682 | ENSG00000136810 |
| "EGR2"          | "CHML"          | "MPHOSPH6"      | "RBM41"         | "TXN"           |
| ENSG00000146731 | ENSG00000163873 | ENSG00000136866 | ENSG00000185885 | ENSG00000108557 |
| "CCT6A"         | "GRIK3"         | "ZFP37"         | "IFITM1"        | "RAI1"          |
| ENSG00000152926 | ENSG00000213462 | ENSG00000146757 | ENSG00000239961 | ENSG00000252835 |
| "ZNF117"        | "ERV3-1"        | "ZNF92"         | "LILRA4"        | "SCARNA21"      |
| ENSG00000197852 | ENSG00000136848 | ENSG00000204099 | ENSG00000134242 | ENSG00000216490 |
| "FAM212B"       | "DAB2IP"        | "NEU4"          | "PTPN22"        | "IFI30"         |
| ENSG00000163564 |                 |                 |                 |                 |
| "PYHIN1"        |                 |                 |                 |                 |

Set of downregulated genes on SF3B1 mutated genes

geneName[names(geneName) %in% upregulated]

|                 |                 |                 |                 |                  |
|-----------------|-----------------|-----------------|-----------------|------------------|
| ENSG00000241781 | ENSG00000247982 | ENSG00000167702 | ENSG00000253475 | ENSG00000167306  |
| "AL161626.1"    | "LINCO0926"     | "KIFC2"         | "RP11-110G21.2" | "MYO5B"          |
| ENSG00000215440 | ENSG00000163590 | ENSG00000184441 | ENSG00000108819 | ENSG00000227039  |
| "NPEPL1"        | "PPM1L"         | "APO01062.7"    | "PPP1R9B"       | "ITGB2-AS1"      |
| ENSG00000068831 | ENSG00000128872 | ENSG00000197549 | ENSG00000211934 | ENSG00000185522  |
| "RASGRP2"       | "TMOD2"         | "PRAMENP"       | "IGHV1-2"       | "C11orf35"       |
| ENSG00000105655 | ENSG00000234902 | ENSG00000211945 | ENSG00000141577 | ENSG00000076344  |
| "ISYNA1"        | "ACO07879.2"    | "IGHV1-18"      | "AZI1"          | "RGS11"          |
| ENSG00000160014 | ENSG00000047644 | ENSG00000169682 | ENSG00000130758 | ENSG00000125347  |
| "CALM3"         | "WWC3"          | "SPNS1"         | "MAP3K10"       | "IRF1"           |
| ENSG00000224796 | ENSG00000225783 | ENSG00000197146 | ENSG00000174996 | ENSG00000125534  |
| "RPL32P1"       | "MIAT"          | "AL133458.1"    | "KLC2"          | "PPDPF"          |
| ENSG00000188599 | ENSG00000248275 | ENSG00000155158 | ENSG00000162877 | ENSG000000051128 |

|                 |                 |                 |                 |                 |
|-----------------|-----------------|-----------------|-----------------|-----------------|
| "NPIPP1"        | "TRIM52-AS1"    | "TTC39B"        | "PM20D1"        | "HOMER3"        |
| ENSG00000168071 | ENSG00000076928 | ENSG00000105663 | ENSG00000231925 | ENSG00000105063 |
| "CCDC88B"       | "ARHGEF1"       | "KMT2B"         | "TAPEP"         | "PPP6R1"        |
| ENSG00000266677 | ENSG00000063169 | ENSG00000105373 | ENSG00000131584 | ENSG00000103249 |
| "RP11-258F1.1"  | "GLTSCR1"       | "GLTSCR2"       | "ACAP3"         | "CLCN7"         |
| ENSG00000251301 | ENSG00000228727 | ENSG00000188185 | ENSG00000146285 | ENSG00000151651 |
| "RP11-81H14.2"  | "SAPCD1"        | "LINCO0265"     | "SCML4"         | "ADAM8"         |
| ENSG00000214021 | ENSG00000063245 | ENSG00000064547 | ENSG00000182379 | ENSG00000196668 |
| "TTLL3"         | "EPN1"          | "LPAR2"         | "NXPH4"         | "LINCO0173"     |
| ENSG00000163704 | ENSG00000124496 | ENSG00000244486 | ENSG00000099910 | ENSG00000136819 |
| "PRRT3"         | "TRERF1"        | "SCARF2"        | "KLHL22"        | "C9orf78"       |
| ENSG00000180096 | ENSG00000005844 | ENSG00000137216 | ENSG00000008710 | ENSG00000127419 |
| "SEPT1"         | "ITGAL"         | "TMEM63B"       | "PKD1"          | "TMEM175"       |
| ENSG00000109113 | ENSG00000135596 | ENSG00000177084 | ENSG00000204681 | ENSG00000127415 |
| "RAB34"         | "MICAL1"        | "POLE"          | "GABBR1"        | "IDUA"          |
| ENSG00000128284 | ENSG00000144283 | ENSG00000139668 | ENSG00000107742 | ENSG00000149499 |
| "APOL3"         | "PKP4"          | "WDFY2"         | "SPOCK2"        | "EML3"          |
| ENSG00000129355 | ENSG00000122707 | ENSG00000160326 | ENSG00000252438 | ENSG00000101493 |
| "CDKN2D"        | "RECK"          | "SLC2A6"        | "SNORD45"       | "ZNF516"        |
| ENSG00000124570 | ENSG00000158526 | ENSG00000161618 | ENSG00000169994 | ENSG00000123933 |
| "SERPINB6"      | "TSR2"          | "ALDH16A1"      | "MYO7B"         | "MXD4"          |
| ENSG00000148384 | ENSG00000143793 | ENSG00000005379 | ENSG00000100321 | ENSG00000122515 |
| "INPP5E"        | "C1orf35"       | "BZRAP1"        | "SYNGR1"        | "ZMIZ2"         |
| ENSG00000196642 | ENSG00000104154 | ENSG00000105698 | ENSG00000077044 | ENSG00000136286 |
| "RABL6"         | "SLC30A4"       | "USF2"          | "DGKD"          | "MYO1G"         |
| ENSG00000142173 | ENSG00000153443 | ENSG00000160799 | ENSG00000100351 | ENSG00000160796 |
| "COL6A2"        | "UBALD1"        | "CCDC12"        | "GRAP2"         | "NBEAL2"        |
| ENSG00000135318 | ENSG00000104960 | ENSG00000168264 | ENSG00000170476 | ENSG00000265735 |
| "NT5E"          | "PTOV1"         | "IRF2BP2"       | "MZB1"          | "RN7SL5P"       |
| ENSG00000004777 | ENSG00000182087 | ENSG00000101400 | ENSG00000185989 | ENSG00000142583 |
| "ARHGAP33"      | "TMEM259"       | "SNTA1"         | "RASA3"         | "SLC2A5"        |
| ENSG00000177483 | ENSG00000071575 | ENSG00000157570 | ENSG00000153551 | ENSG00000174944 |
| "RBM44"         | "TRIB2"         | "TSPAN18"       | "CMTM7"         | "P2RY14"        |
| ENSG00000164574 | ENSG00000182195 | ENSG00000185920 | ENSG00000133275 | ENSG00000154134 |
| "GALNT10"       | "LDOC1"         | "PTCH1"         | "CSNK1G2"       | "ROBO3"         |
| ENSG00000072071 | ENSG00000104897 | ENSG00000260054 | ENSG00000135736 | ENSG00000104814 |
| "LPHN1"         | "SF3A2"         | "RP11-611L7.1"  | "CCDC102A"      | "MAP4K1"        |
| ENSG00000137571 | ENSG00000184164 | ENSG00000132718 | ENSG00000007264 | ENSG00000100258 |
| "SLC05A1"       | "CRELD2"        | "SYT11"         | "MATK"          | "LMF2"          |
| ENSG00000106780 | ENSG00000099331 | ENSG00000167280 | ENSG00000185864 | ENSG00000143320 |

|                 |                 |                 |                 |                 |
|-----------------|-----------------|-----------------|-----------------|-----------------|
| "MEGF9"         | "MYO9B"         | "ENGASE"        | "NPIP4"         | "CRABP2"        |
| ENSG00000119608 | ENSG00000198910 | ENSG00000139899 | ENSG00000105639 | ENSG00000134250 |
| "PROX2"         | "L1CAM"         | "CBLN3"         | "JAK3"          | "NOTCH2"        |
| ENSG00000125648 | ENSG00000168280 | ENSG00000075826 | ENSG00000163386 | ENSG00000145020 |
| "SLC25A23"      | "KIF5C"         | "SEC31B"        | "NBPF10"        | "AMT"           |
| ENSG00000198816 | ENSG00000182179 |                 |                 |                 |
| "ZNF358"        | "UBA7"          |                 |                 |                 |

## 5 Figures

We load the data from the supplementary materials presented by Furney et al, and load the information from the pfam domains.

```

suppressMessages( library(ggbio ) )
suppressMessages(library(AnnotationDbi))
suppressMessages(library(GenomicRanges))
suppressMessages(library(GenomicFeatures))
suppressMessages(library(Biostrings))
colorSamples <- c("#238B45", "#238B45", "#0C2C84", "#0C2C84", "#0C2C84", "#0C2C84")
colorConditions <- c("#238B45", "#0C2C84")
path <- system.file(package="CLL.SF3B1", "extdata")
um <- read.delim( list.files( path, pattern="^furney", full.names=TRUE ) )
umRanges <- GRanges(um$chr, IRanges( start=um$start, end=um$end ), um$strand )

data("domains")

```

We also need to create a transcript database object based on the annotation file. We first download from ENSEMBL the reference fasta files and the annotation file in the gtf format. We need both of this in order to create our transcript database. This is done in a command line, not in an R session:

```

wget \
ftp://ftp.ensembl.org/pub/release-68/fasta/homo_sapiens/dna/Homo_sapiens.GRCh37.68.dna

gunzip Homo_sapiens.GRCh37.68.dna_sm.primary_assembly.fa.gz

wget \
ftp://ftp.ensembl.org/pub/release-68/gtf/homo_sapiens/Homo_sapiens.GRCh37.68.gtf.gz

```

```
gunzip Homo_sapiens.GRCh37.68.gtf.gz
perl -ne 'if( $_ !~ /^(HS|\S+PATCH|HG)/){ print $_; }' Homo_sapiens.GRCh37.68.gtf \
> Homo_sapiens.GRCh37.68.filtered.gtf
```

We now can create the transcript database in our R session based on the files that we downloaded:

```
fastq <- readDNASTringSet("Homo_sapiens.GRCh37.68.dna_sm.primary_assembly.fa")

df <- data.frame(
  chrom=sapply( strsplit( names(fastq), " " ), "[[", 1),
  length=length(fastq),
  is_circular=rep(FALSE, length(fastq)))

transcriptDb <- makeTranscriptDbFromGFF(
  "Homo_sapiens.GRCh37.68.filtered.gtf",
  format="gtf",
  exonRankAttributeName="exon_number",
  chrominfo=df,
  dataSource=paste("ensembl human release 68"),
  species="Homo sapiens"
)

saveDb(transcriptDb, file="transcriptDb.sqlite")
```

We load the transcriptDb object

```
library(GenomicFeatures)
transcriptDb <- loadDb("transcriptDb.sqlite")
```

Below is the code that was used to create the templates for each figure, afterwards they were merged, modified and adapted to the journal requirements using inkscape.

## 5.1 Figure 1

We use the package h5vc in order to generate this figure, this package is designed to work with genomic DNA sequencing. Here we tricked h5vc and

use it with RNA-seq data in order to see the expression of the SF3B1 K700E variant.

```
library(CLL.SF3B1)

path <- system.file( package="CLL.SF3B1" )
path <- file.path( path, "bam" )
bamFiles <- list.files( path, pattern="bam$" )

suppressPackageStartupMessages(library(h5vc))
suppressPackageStartupMessages(library(rhdf5))
suppressPackageStartupMessages(library(deepSNV))

chrom <- "2"
study <- "/SF3B1"

tallyFile <- file.path(".", "SF3B1.tally.hfs5")
if (file.exists(tallyFile)) {
  file.remove(tallyFile)
}

h5createFile(tallyFile)
group <- paste(study, chrom, sep = "/")
h5createGroup(tallyFile, study)
h5createGroup(tallyFile, group)

end <- 198299815
start <- 198256698
dim4 <- end +1000

h5createDataset(tallyFile,
  paste(group, "Counts", sep = "/"), dims = c(12, 6,
  2, dim4), storage.mode = "integer", level = 9)

h5createDataset(tallyFile,
  paste(group, "Coverages", sep = "/"), dims = c( 6,
  2, dim4), storage.mode = "integer", level = 9)

h5createDataset(tallyFile,
```

```

paste(group, "Deletions", sep = "/"), dims = c(6,
2, dim4), storage.mode = "integer", level = 9)

h5createDataset(tallyFile,
paste(group, "Reference", sep = "/"), dims = c(dim4),
storage.mode = "integer", level = 9)

sample <- sapply( strsplit( bamFiles, "_sf3B1"), "[[", 1)
names( sample ) <- c("1", "2", "6", "5", "4", "3")

sampleData <- data.frame(
Sample = sample, Column=0:5,
Patient=names(sample),
Type = c("CLL", "CLL", "CLL", "CLL", "healthy", "healthy"),
stringsAsFactors = FALSE)

sampleData

setSampleData(tallyFile, group, sampleData)
getSampleData(tallyFile, group )

Counts <- lapply(file.path(path, bamFiles), function(bamf){
bam2R( file=bamf, chr=chrom, start=start, stop=end )
})

Coverages <- lapply(Counts, function(count) matrix(c(rowSums(count[, c("A",
"C", "G", "T", "DEL")]), rowSums(count[, c("a", "c", "g", "t", "del")])),
ncol = 2, byrow = FALSE, dimnames = list(NULL, c("Fwd", "Rev"))))
Deletions <- lapply(Counts, function(count) count[, c("DEL", "del")])
Counts <- lapply(Counts, function(count) count[, c("A", "C", "G", "T", "a",
"c", "g", "t")])
ref <- apply(Counts[[1]][, 1:4] +
Counts[[1]][5:8] + Counts[[2]][, 1:4] +
Counts[[2]][5:8],
1, which.max)

for( j in 1:6){
for (i in seq(length(ref))) {
Counts[[j]][i, ref[i]] <- 0
Counts[[j]][i, (ref[i] + 4)] <- 0
}
}

```

```

    }
}

Reference <- ref - 1
h5ls(tallyFile)

for( sample in 1:6 ){
  h5write(t(Counts[[sample]][, 1:4])+t(Counts[[sample]][, 5:8]),
    tallyFile, paste(group, "Counts", sep = "/"),
    index = list(5:8, sample, 1, start:end))
  h5write(Coverages[[sample]][, "Fwd"] + Coverages[[sample]][, "Rev"],
    tallyFile, paste(group, "Coverages",
    sep = "/"), index = list(sample, 1, start:end))
}

h5write(Reference, tallyFile,
  paste(group, "Reference", sep = "/"),
  index =list( start:end))

position <- 198266834
windowsize <- 20

data <- h5dapply(filename = tallyFile,
  group = group, blocksize = 1e+08,
  range = c(position -
    windowsize, position + windowsize))[[1]]
sampledata <- getSampleData(tallyFile, group)
samples <- sampledata$Sample

[1] TRUE

Sample Column Patient      Type

```

```

1 sample1_sf3b1.bam      0      1      CLL
2 sample2_sf3b1.bam      1      2      CLL
6 sample3_sf3b1.bam      2      6      CLL
5 sample4_sf3b1.bam      3      5      CLL
4 sample5_sf3b1.bam      4      4 healthy
3 sample6_sf3b1.bam      5      3 healthy
  Column Patient          Sample  Type
1      1      1 sample1_sf3b1.bam  CLL
2      2      2 sample2_sf3b1.bam  CLL
3      3      6 sample3_sf3b1.bam  CLL
4      4      5 sample4_sf3b1.bam  CLL
5      5      4 sample5_sf3b1.bam healthy
6      6      3 sample6_sf3b1.bam healthy
  group      name      otype  dclass      dim
0      /      SF3B1      H5I_GROUP
1  /SF3B1      2      H5I_GROUP
2  /SF3B1/2      Counts H5I_DATASET INTEGER 12 x 6 x 2 x 198300815
3  /SF3B1/2      Coverages H5I_DATASET INTEGER      6 x 2 x 198300815
4  /SF3B1/2      Deletions H5I_DATASET INTEGER      6 x 2 x 198300815
5  /SF3B1/2      Reference H5I_DATASET INTEGER      198300815

library(ggplot2)
p <- mismatchPlot(data, sampledata,
  samples, windowsize, position) + facet_wrap(
  ~ Sample, ncol = 2)
print(p)

```



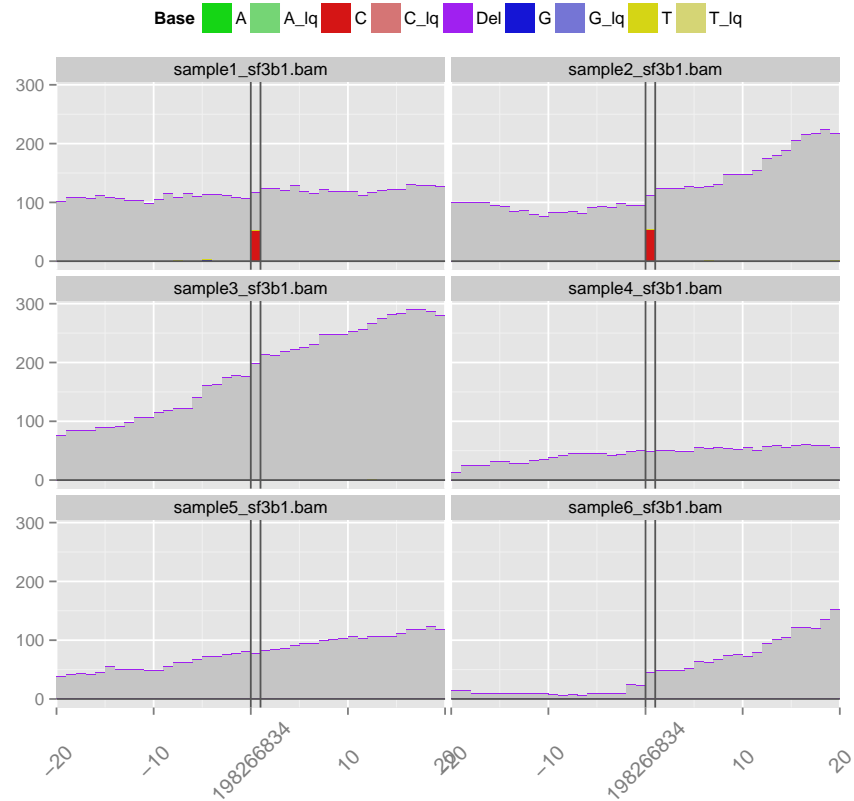

Note that this plot was generated from the coverage calculated to the “+” strand and SF3B1 is on the minus strand. Therefore this plot was mirrored afterwards with inkscape so that it reflected the coverage for the “-” strand.

## 5.2 Figure 2: RPL31

```
plotDEXSeq(ecsSF3B1, "ENSG00000071082",
  norCounts=TRUE, lwd=1.3, legend=TRUE, fitExpToVar="sf3b1",
  splicing=FALSE, expression=FALSE,
  cex.axis=1, color=c("#238B45", "#0C2C84"),
  color.samples=colorSamples)
```

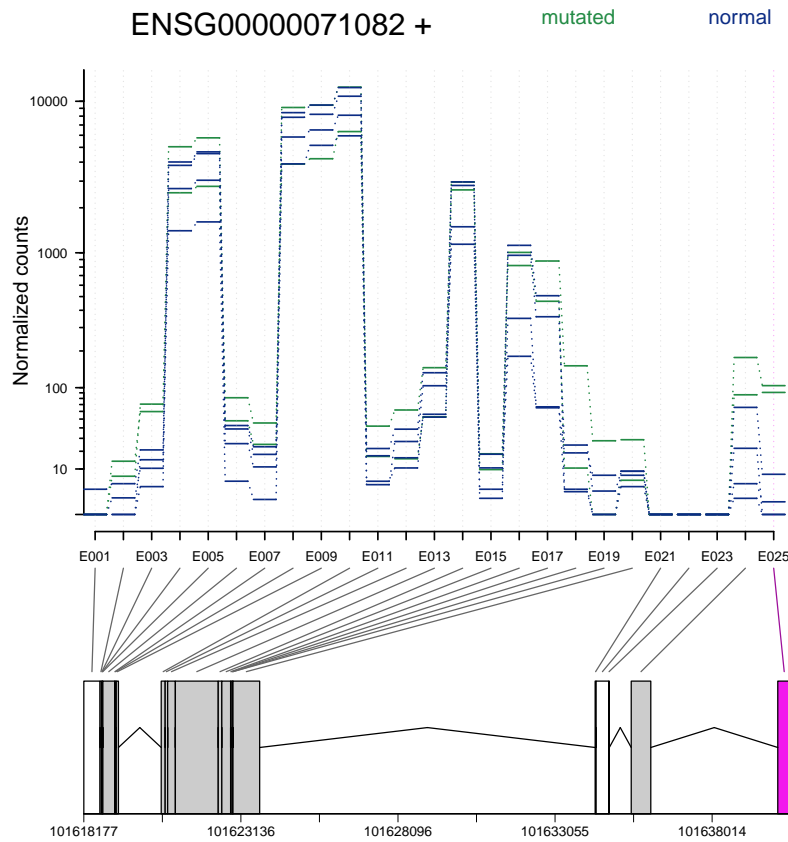

zoomed region,

```
library(ggbio)
thisRange <- fData(ecsSF3B1)[geneIDs(ecsSF3B1)
  %in% "ENSG00000071082",
  c("chr", "start", "end", "strand", "padjust")]
exonRange <- GRanges( thisRange$chr,
  IRanges(
    start=thisRange$start,
    end=thisRange$end,
    names=rownames(thisRange)),
  thisRange$strand )

geneRange <- GRanges( 2, IRanges(start=101618000, end=101640594))
exonRange$significant <- as.numeric( thisRange$padjust < 0.1 )
```

```

exonRange$significant[is.na( exonRange$significant )] <- 0
overlap <- findOverlaps( exonRange, umRanges, type="equal" )
exonRange$significantUM <-
  as.numeric( names( exonRange ) %in%
    names( exonRange[queryHits(
      findOverlaps( exonRange, umRanges, type="equal" ) ] ) ) )
wh <- geneRange

tracks(
  autoplot( GRangesList( exonRange ),
    fill=ifelse(exonRange$significant == 1, "#F219ED", "gray"),
    colour=ifelse(exonRange$significant == 1, "black", "black")),
  autoplot( GRangesList( exonRange ),
    fill=ifelse(exonRange$significantUM == 1, "#F219ED", "gray"),
    colour=ifelse(exonRange$significantUM == 1, "black", "black")),
  autoplot( transcriptDb, wh, group.selfish=TRUE, names.expr=""),
  xlim=wh, heights=c(1, 1, 2))

```

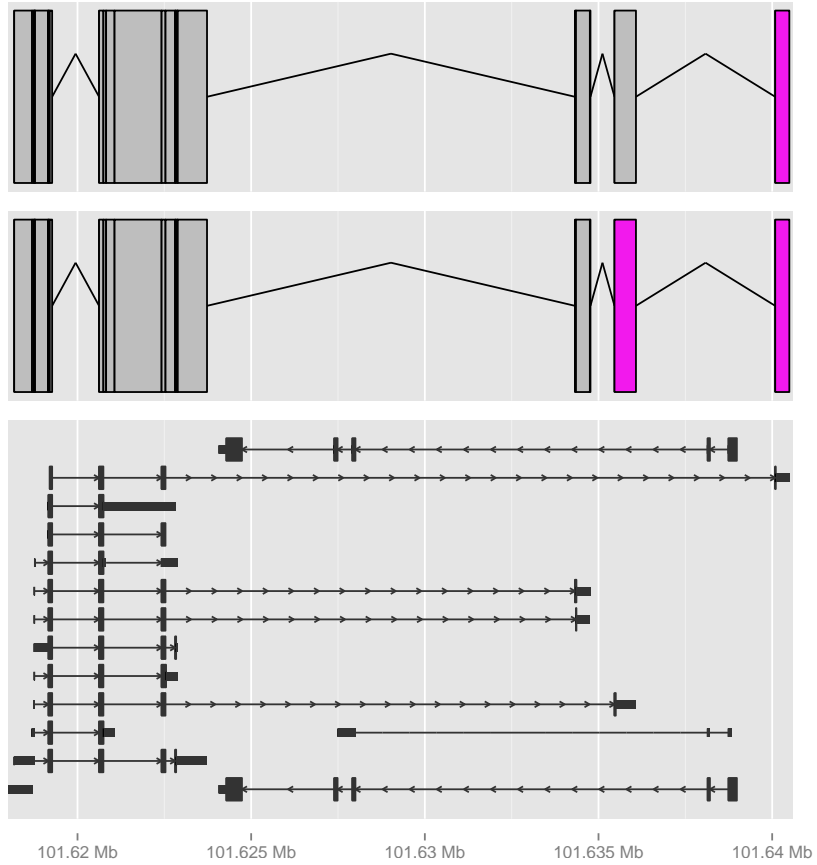

5.3 Figure 3: UQCC

```

plotDEXSeq(ecsSF3B1, "ENSG00000101019",
  norCounts=TRUE, lwd=1.3, legend=TRUE, fitExpToVar="sf3b1",
  splicing=FALSE, expression=FALSE,
  cex.axis=1, color=c("#238B45", "#0C2C84"),
  color.samples=colorSamples)

```

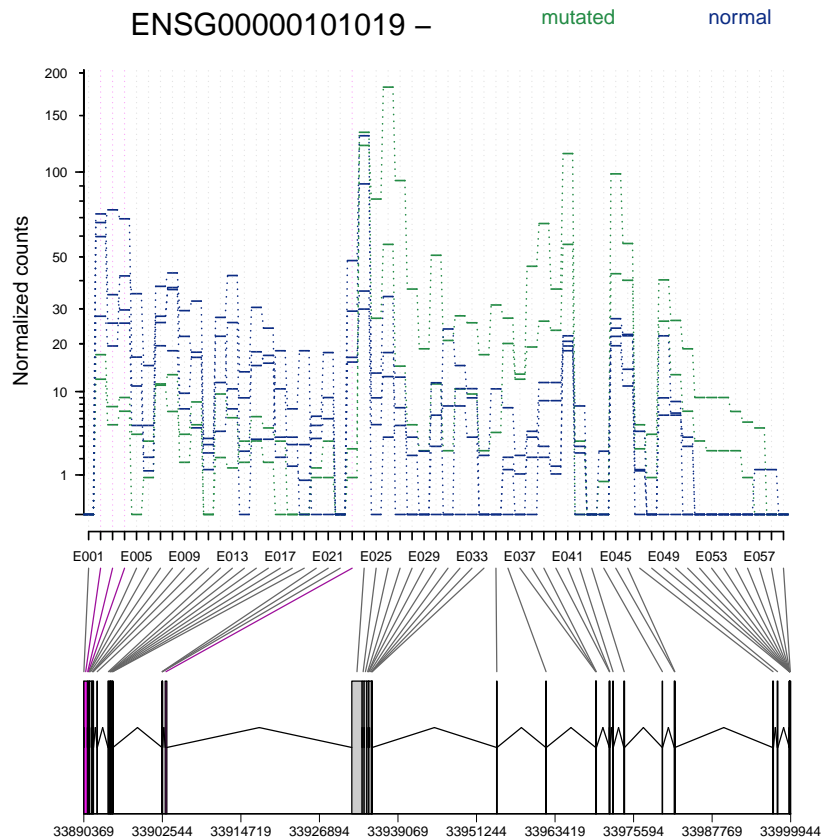

```

thisRange <- fData(ecsSF3B1)[
  geneIDs(ecsSF3B1) %in% "ENSG00000101019",
  c("chr", "start", "end", "strand", "padjust")]
exonRange <- GRanges( thisRange$chr,
  IRanges(
    start=thisRange$start,
    end=thisRange$end,
    names=rownames(thisRange)),
  thisRange$strand )

geneRange <- GRanges( 20, IRanges(start=33890369, end=33999944))
exonRange$significant <- as.numeric( thisRange$padjust < 0.1 )
exonRange$significant[is.na( exonRange$significant )] <- 0
overlap <- findOverlaps( exonRange, umRanges, type="equal" )

```

```

exonRange$significantUM <- as.numeric(
  names( exonRange ) %in% names(
    exonRange[queryHits(
      findOverlaps( exonRange, umRanges, type="equal" ) ] ] ) )
wh <- geneRange

domainRange <- GRangesList(
  reduce( unique(
    domainRanges[
      subjectHits( findOverlaps( geneRange, domainRanges ) ] ] )
  ) )

tracks(
  autoplot( GRangesList( exonRange ),
    fill=ifelse(exonRange$significant == 1, "#F219ED", "gray"),
    colour=ifelse(exonRange$significant == 1, "black", "black")),
  autoplot( GRangesList( exonRange ),
    fill=ifelse(exonRange$significantUM == 1, "#F219ED", "gray"),
    colour=ifelse(exonRange$significant == 1, "black", "black")),
  autoplot( domainRange ), heights=c(1, 1, 1), xlim=wh)

```

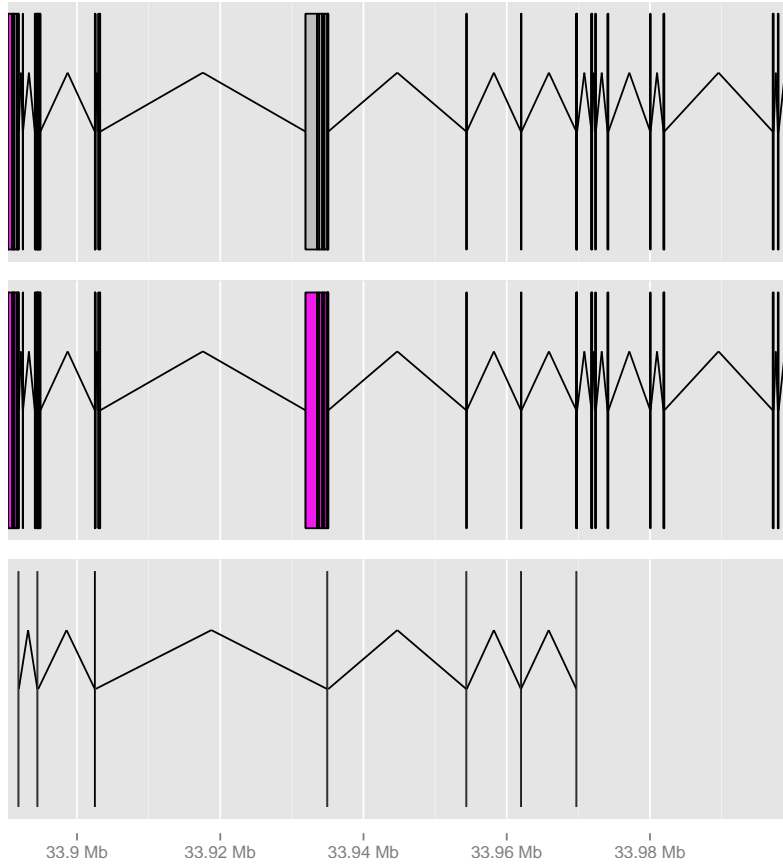

```

plotDEXSeq(ecsf3b1, "ENSG00000162894", norCounts=TRUE,
  lwd=1, legend=TRUE, fitExpToVar="sf3b1", splicing=FALSE,
  expression=FALSE, cex.axis=1, color=colorConditions,
  color.samples=colorSamples,
  displayTranscripts=FALSE, names=FALSE)

```

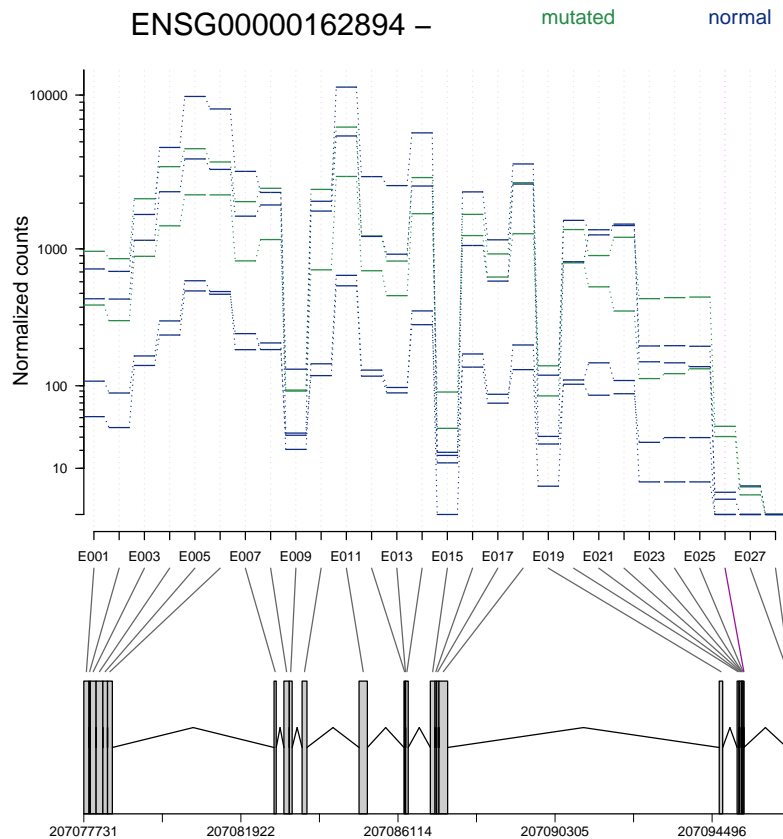

```

thisRange <- fData(ecsSF3B1)[
  geneIDs(ecsSF3B1) %in% "ENSG00000162894",
  c("chr", "start", "end", "strand", "padjust")]
thisRange$padjust[is.na( thisRange$padjust )] <- 1
geneRange <- GRanges( thisRange$chr,
  IRanges(
    start=thisRange$start,
    end=thisRange$end,
    names=rownames(thisRange)),
  thisRange$strand )
geneRange$significant <- as.numeric( thisRange$padjust < 0.1 )
wr <- GRanges( "1", IRanges(start=207095100, end=207095400 ) )

tr1 <- autoplot( transcriptDb, which=wr, group.selfish=TRUE, names.expr=FALSE )

```



```

tr2 <- autoplot(
  GRangesList( geneRange ),
  colour=ifelse(geneRange$significant == 1,
    "#F219ED", "black"))

tracks( tr2, tr1, heights=c(1, 2), xlim=wr )

```

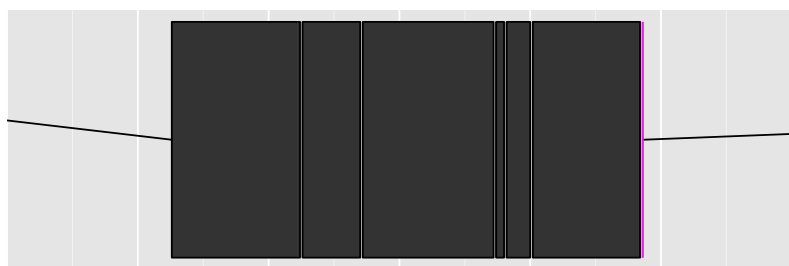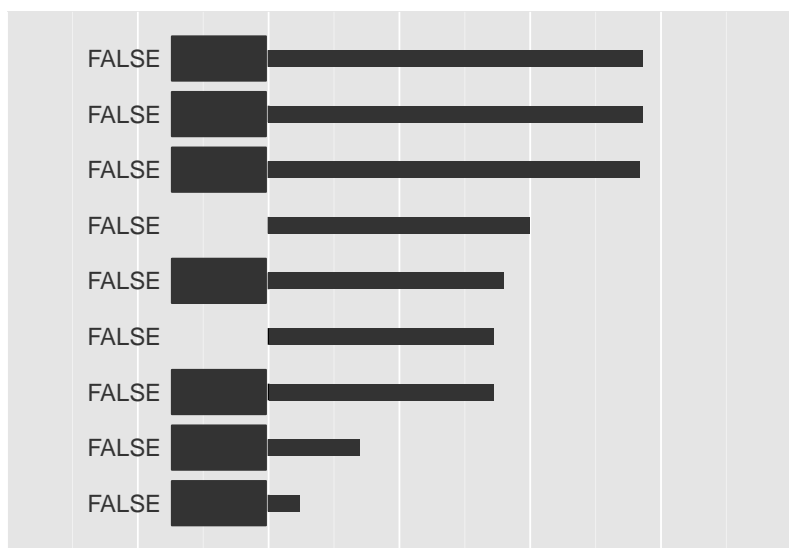

207.0951 Mb 207.09515 Mb 207.0952 Mb 207.09525 Mb 207.0953 Mb 207.09535 Mb 207.0954 Mb  
 PLOT NFAT5

```

plotDEXSeq(ecsSF3B1, "ENSG00000102908",
  norCounts=TRUE, lwd=1, legend=TRUE,
  fitExpToVar="sf3b1", splicing=FALSE,
  expression=FALSE, cex.axis=1,

```

```
color=colorConditions, color.samples=colorSamples)
```

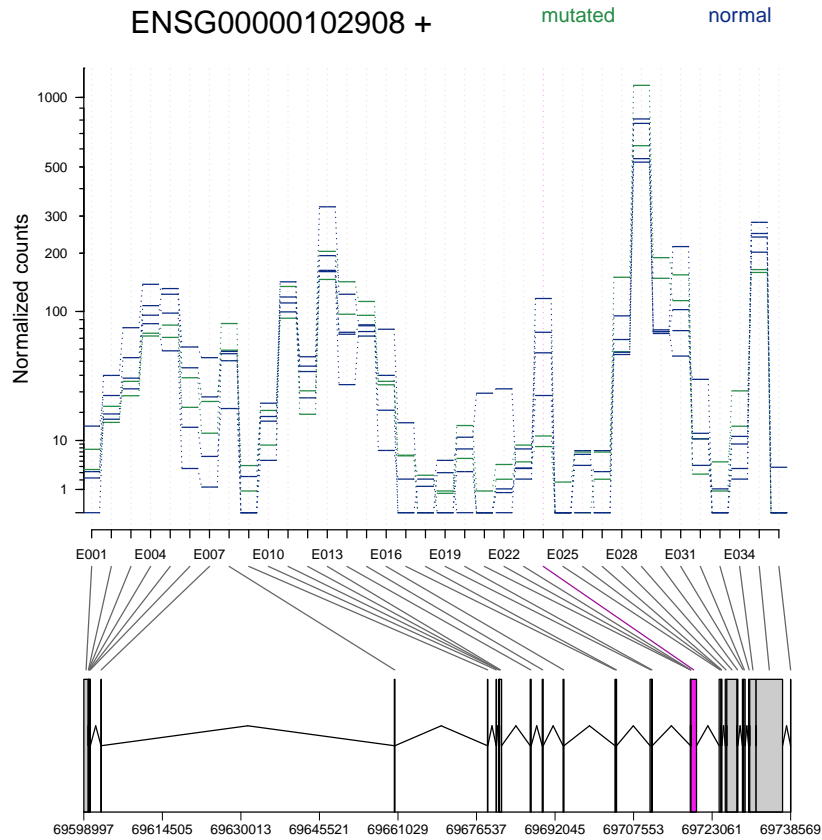

```
thisRange <- fData(ecsSF3B1)[
  geneIDs(ecsSF3B1) %in% "ENSG00000102908",
  c("chr", "start", "end", "strand", "padjust")]
thisRange$padjust[is.na( thisRange$padjust )] <- 1
geneRange <- GRanges( thisRange$chr,
  IRanges(
    start=thisRange$start,
    end=thisRange$end,
    names=rownames(thisRange)),
  thisRange$strand )
geneRange$significant <- as.numeric( thisRange$padjust < 0.1 )
```

```

prueba <- GRanges( "16", IRanges(start=69718874-150, end=69719978+100 ))

tr1 <- autoplot( transcriptDb, prueba, group.selfish=TRUE, names.expr="" )
tr2 <- autoplot( GRangesList( geneRange ),
  fill=ifelse(geneRange$significant == 1, "#F219ED", "black"))
tracks( tr2, tr1, heights=c(1, 2), xlim=prueba )

```

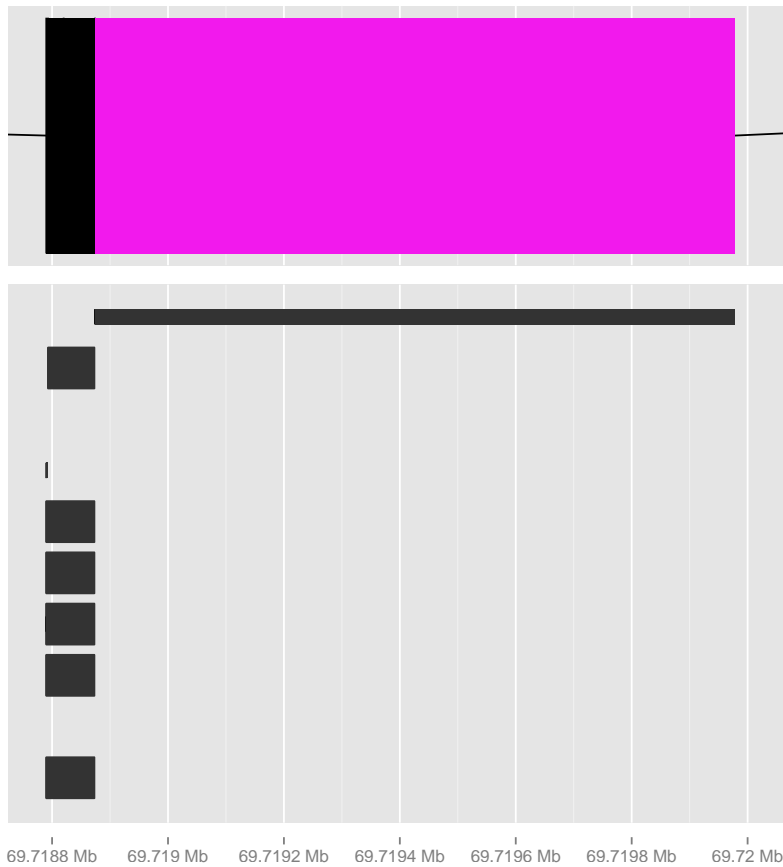

## 6 Session information

```
sessionInfo()
```

```
R version 3.0.3 (2014-03-06)
```

```
Platform: x86_64-unknown-linux-gnu (64-bit)
```

locale:

```
[1] LC_CTYPE=en_US.UTF-8      LC_NUMERIC=C
[3] LC_TIME=en_US.UTF-8      LC_COLLATE=en_US.UTF-8
[5] LC_MONETARY=en_US.UTF-8  LC_MESSAGES=en_US.UTF-8
[7] LC_PAPER=en_US.UTF-8     LC_NAME=C
[9] LC_ADDRESS=C             LC_TELEPHONE=C
[11] LC_MEASUREMENT=en_US.UTF-8 LC_IDENTIFICATION=C
```

attached base packages:

```
[1] stats4    splines    parallel  stats      graphics  grDevices  utils
[8] datasets  methods   base
```

other attached packages:

```
[1] deepSNV_1.8.0          VariantAnnotation_1.8.13 VGAM_0.9-4
[4] Rsamtools_1.14.3      bit64_0.9-4             bit_1.1-12
[7] rhdf5_2.6.0           h5vc_1.0.0              Biostrings_2.30.1
[10] GenomicFeatures_1.14.5 AnnotationDbi_1.24.0    ggbio_1.10.16
[13] ggplot2_1.0.0         biomaRt_2.18.0         CLL.SF3B1_0.0.1
[16] DESeq2_1.2.10        RcppArmadillo_0.4.300.0 Rcpp_0.11.1
[19] GenomicRanges_1.14.4 XVector_0.2.0           IRanges_1.20.7
[22] DEXSeq_1.8.0         Biobase_2.22.0         BiocGenerics_0.8.0
[25] BiocInstaller_1.12.1
```

loaded via a namespace (and not attached):

```
[1] annotate_1.40.1        biovizBase_1.10.8      bitops_1.0-6
[4] BSgenome_1.30.0      cluster_1.15.2         colorspace_1.2-4
[7] DBI_0.2-7            dichromat_2.0-0        digest_0.6.4
[10] Formula_1.1-1        genefilter_1.44.0     grid_3.0.3
[13] gridExtra_0.9.1      gtable_0.1.2          Hmisc_3.14-4
[16] hwriter_1.3          labeling_0.2           lattice_0.20-29
[19] latticeExtra_0.6-26 locfit_1.5-9.1        MASS_7.3-33
[22] munsell_0.4.2        plyr_1.8.1            proto_0.3-10
[25] RColorBrewer_1.0-5   RCurl_1.95-4.1        reshape_0.8.5
[28] reshape2_1.4         RSQLite_0.11.4        rtracklayer_1.22.7
[31] scales_0.2.4         statmod_1.4.18        stringr_0.6.2
[34] survival_2.37-7     tools_3.0.3           XML_3.98-1.1
[37] xtable_1.7-3        zlibbioc_1.8.0
```
